# Supplementary material for: Specific IgE and Basophil Activation Test by Microarray: A Promising Tool for Diagnosis of Platinum Compound Hypersensitivity Reactions
Source: MDPI journal article supplement (doi:10.3390/ijms25073890), 2024-03-31
Supplement: s1 [file s1]

Supplementary Figures

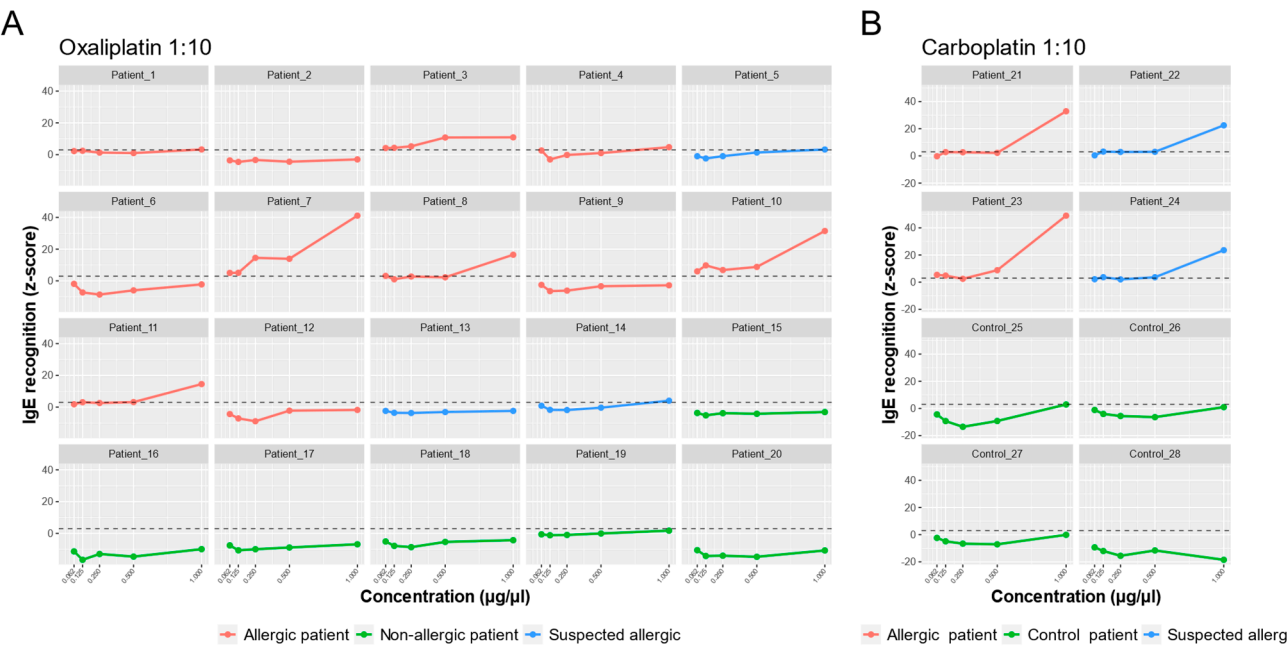

**Supplementary Figure S1.** sIgE microarrays immunoassay. The y-axis shows the average IgE binding represented as average Z-scores. The x-axis shows the drug concentration: oxaliplatin (A) and carboplatin (B) 1:10 molar ratio. The standardized fluorescence intensity represented as the average Z-score was considered positive if it exceeded 3 (dotted line).

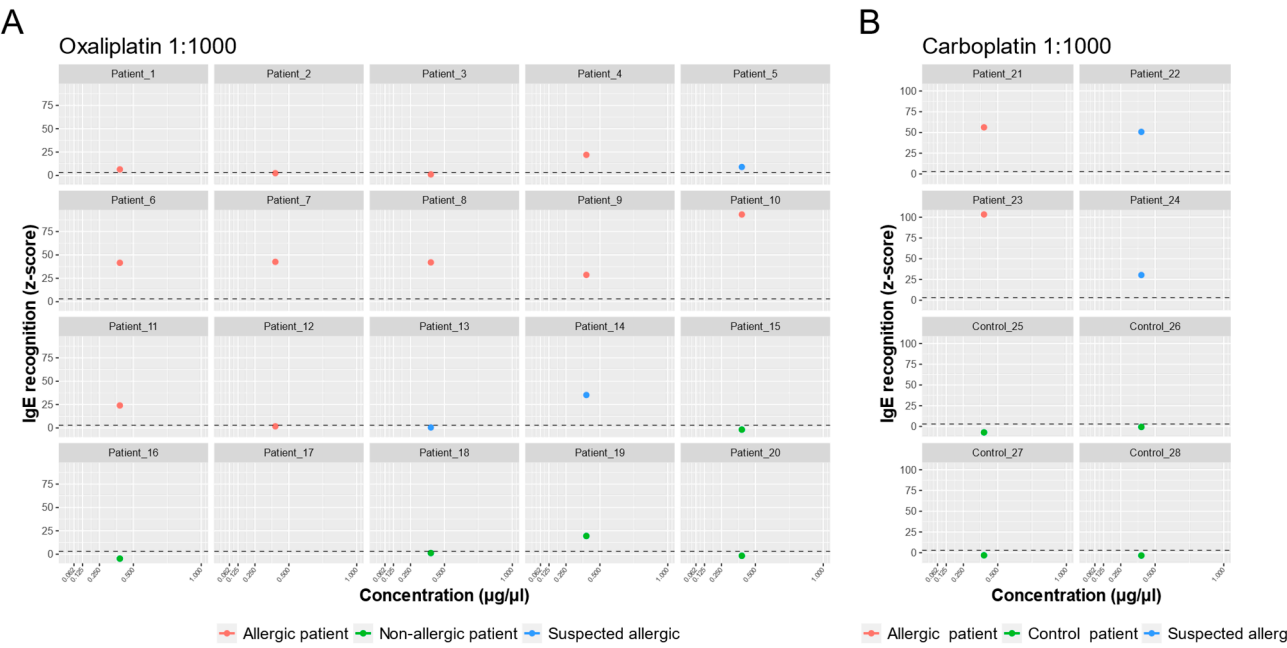

**Supplementary Figure S2.** sIgE microarrays immunoassay. The y-axis shows the average IgE binding represented as average Z-scores. The x-axis shows the drug concentration: oxaliplatin (A) and carboplatin (B) 1:1000 molar ratio. The standardized fluorescence intensity represented as the average Z-score was considered positive if it exceeded 3 (dotted line).

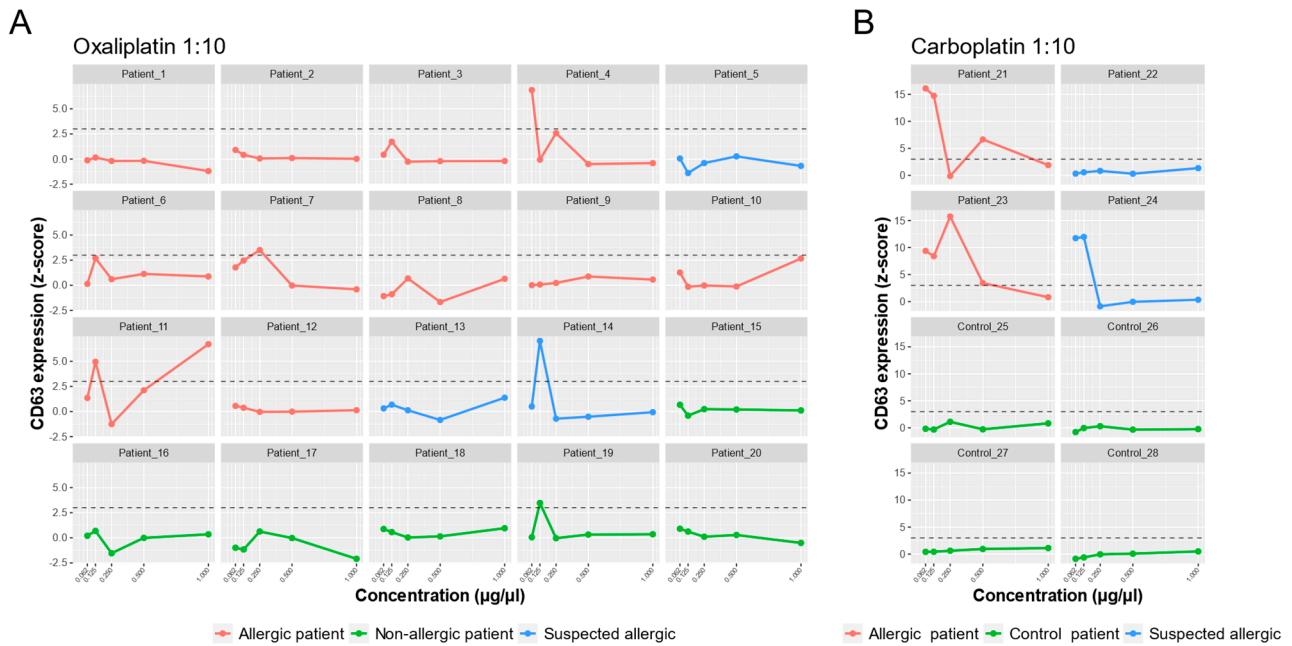

**Supplementary Figure S3.** BAT-microarray immunoassay. The y-axis shows the average CD63 expression represented as average Z-scores. The x-axis shows the drug concentration: oxaliplatin (A) and carboplatin (B) 1:10 molar ratio. The standardized fluorescence intensity represented as the average Z-score was considered positive if it exceeded 3 (dotted line).

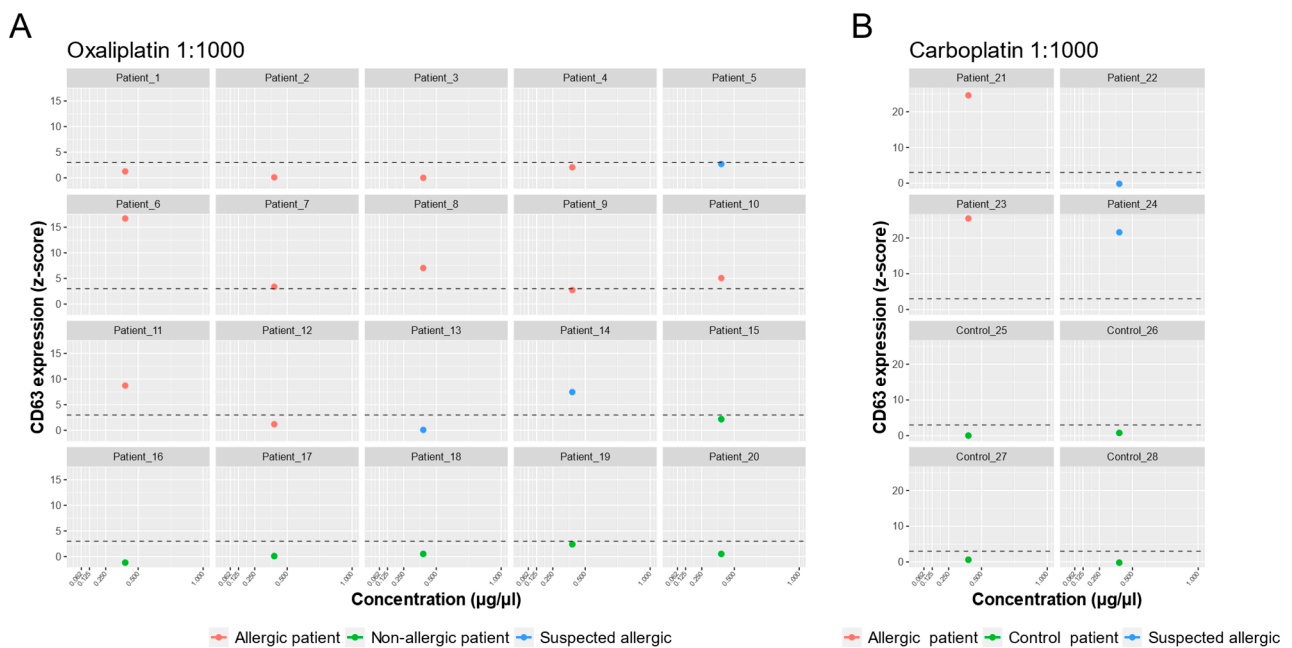

**Supplementary Figure S4.** BAT-microarray immunoassay. The y-axis shows the average CD63 expression represented as average Z-scores. The x-axis shows the drug concentration: oxaliplatin (A) and carboplatin (B) 1:1000 molar ratio. The standardized fluorescence intensity represented as the average Z-score was considered positive if it exceeded 3 (dotted line).
